# Supplementary material for: Ca 2+ /Zn 2+ alginate hydrogel electrolyte for high-performance zinc–ion batteries
Source: Royal Society of Chemistry journal article supplement (doi:10.1039/d5sm00906e), 2025-11-21
Supplement: d5sm00906e1.pdf [file d5sm00906e1.pdf]

## Supplementary Information

### **Ca<sup>2+</sup>/Zn<sup>2+</sup> Alginate Hydrogel Electrolyte for High-Performance Zinc-Ion Batteries**

Qiaoyu Ma<sup>a</sup>, Chengcheng Yin<sup>a</sup>, Zhongyang Wang<sup>a</sup>, Guangbin Duan<sup>a</sup>, Degang Zhao<sup>a</sup>,  
Shuhua Yang<sup>a,b,\*</sup>

<sup>a</sup> Materials Center for Energy and Photoelectrochemical Conversion, School of Material Science and Engineering, University of Jinan, Jinan 250022, China

<sup>b</sup> Key Laboratory of Advanced Energy Materials Chemistry (Ministry of Education), Nankai University, Tianjin 300071, China

\*Corresponding author:

E-mail: yangshuhua78@163.com (Shuhua Yang)

## **S1. Materials**

Sodium alginate (SA, AR, > 99 %) were purchased from Aladdin Chemical Reagent Co., Ltd.  $\text{CaCl}_2 \cdot 2\text{H}_2\text{O}$  (AR, > 99 %),  $\text{ZnSO}_4 \cdot 7\text{H}_2\text{O}$  (AR, > 99 %) was purchased from Macklin Chemical Reagent Co., Ltd..

## **S2. Preparation of hydrogel electrolytes**

Firstly, 1 g of SA (sodium alginate) was homogeneously mixed with 49 mL of  $\text{H}_2\text{O}$  at room temperature under constant stirring. An appropriate amount of the precursor solution was then drawn using a syringe and injected into the mold, followed by standing until a uniform liquid level was achieved. Subsequently, 1 wt%  $\text{CaCl}_2$  solution and 2M  $\text{ZnSO}_4$  were sequentially added to prepare SCa (calcium-crosslinked) and SZn (zinc-crosslinked) hydrogels, respectively. The as-prepared SCa and SZn hydrogels were then immersed in 2M  $\text{ZnSO}_4$  solution for 24 h to undergo secondary crosslinking and ion exchange processes, ultimately yielding SZn and SCZ (calcium-zinc bimetallic crosslinked) hydrogel electrolytes.

## **S3. Characterization**

The surface morphologies of the hydrogel and Zn anode were determined using a scanning electron microscope (SEM, QUANTA 250 FEG, 30 kV). The hydrogel sample was analyzed by Fourier transform infrared spectroscopy (FTIR, Bruker Vertex-70). The crystal structure of the Zn anode was characterized using an X-ray diffractometer (XRD, SmartLab 9KW).

The tensile strength of the hydrogel was measured using a universal mechanical

testing machine.

All electrochemical performance tests were conducted at room temperature. CR2032-type coin cells (Zn//Zn, Zn//Cu, and Zn//MnO<sub>2</sub>) were assembled in an ambient atmosphere using glass fiber as the separator and 90 µL of 2M ZnSO<sub>4</sub> solution with SZn and SCZ as electrolytes. All cells were allowed to rest for 6 h after assembly. The cycling performance of Zn//Zn cells was evaluated, while the coulombic efficiency of Zn//Cu cells was tested on a Neware battery testing system. Galvanostatic charge-discharge tests (CT-4008T) were performed for Zn//MnO<sub>2</sub> cells.

Cyclic voltammetry (CV), linear sweep voltammetry (LSV), and electrochemical impedance spectroscopy (EIS) measurements (frequency range: 10<sup>-1</sup>~10<sup>5</sup> Hz) were carried out on an electrochemical workstation (EmStat 4S HR, PalmSens, Netherlands).

#### **S4. Water content and porosity**

The water content ( $W_c$ ) of the SCZ hydrogel was determined using a simple "drying method." To ensure accuracy, three parallel samples were vacuum-dried at 60 °C for 24 h. The calculation formula is as follows:

$$W_c = \frac{M_0 - M_s}{M_0} \cdot 100 \%$$

where  $M_0$  is the initial mass of the sample and  $M_s$  is the mass after drying.

The water content values for the three samples were 63.46%, 64.44%, and 64.13%, respectively. Its average value is 64.01 %.

Porosity was measured using the liquid displacement method. Three parallel samples were freeze-dried for 12 h. The calculation formula is as follows:

$$Porosity = \frac{W_f - W_0}{\rho V_0} \cdot 100 \%$$

where  $W_f$  is the final mass of the sample,  $W_0$  is the initial mass,  $V_0$  is the volume of the sample, and  $\rho$  is the density of ethanol at room temperature (0.789 g/cm<sup>3</sup>).

The porosity values for the three samples were 67.43%, 67.63%, and 68.28%, respectively. Its average value is 67.78 %.

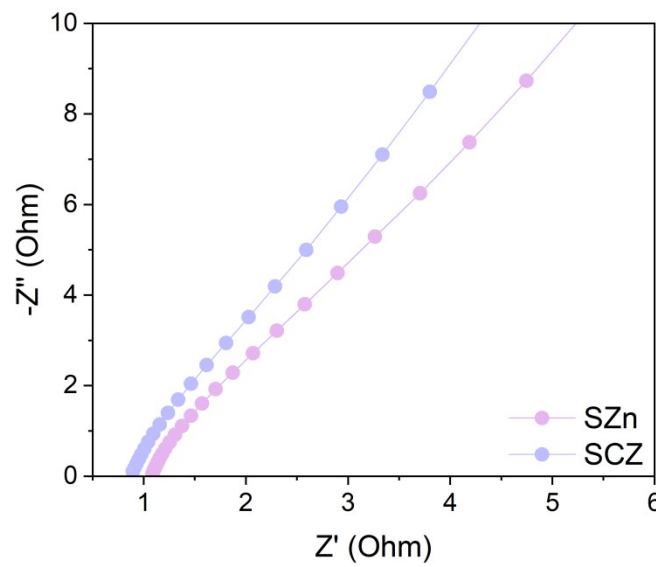

**Figure S1.** The electrochemical impedance spectra (EIS) of SZn and SCZ were measured in the frequency range of  $10^{-1} \sim 10^5$  Hz under open-circuit potential conditions.

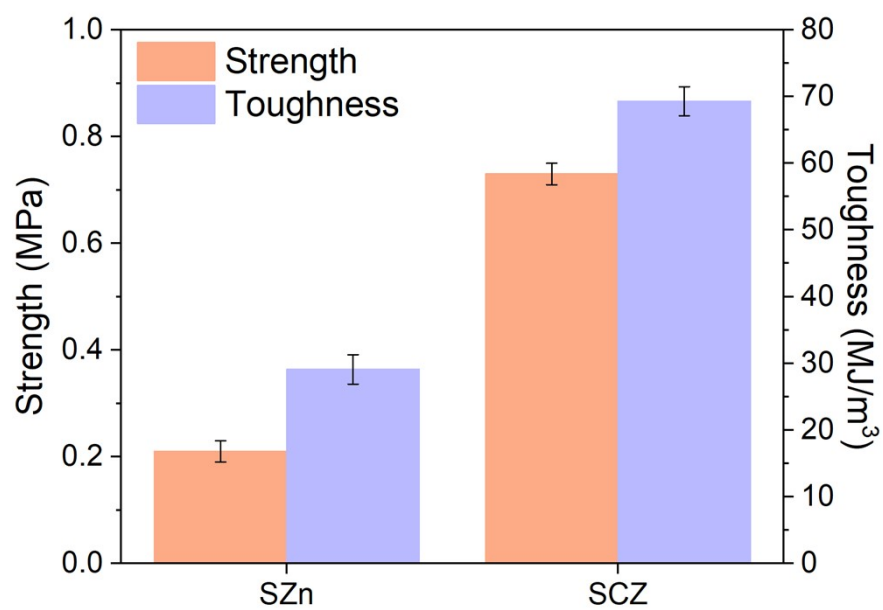

**Figure S2.** The strength and toughness of SZn and SCZ hydrogels.

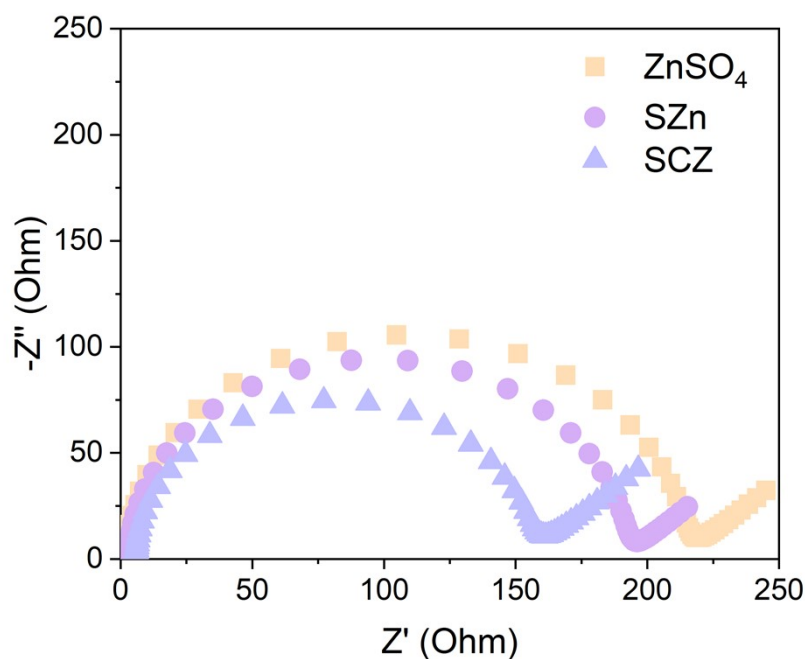

**Figure S3.** The EIS of Zn//Zn symmetric cells assembled with  $\text{ZnSO}_4$ , SZn, and SCZ electrolytes were measured in the frequency range of  $10^{-1} \sim 10^5$  Hz under open-circuit potential (OCP) conditions.

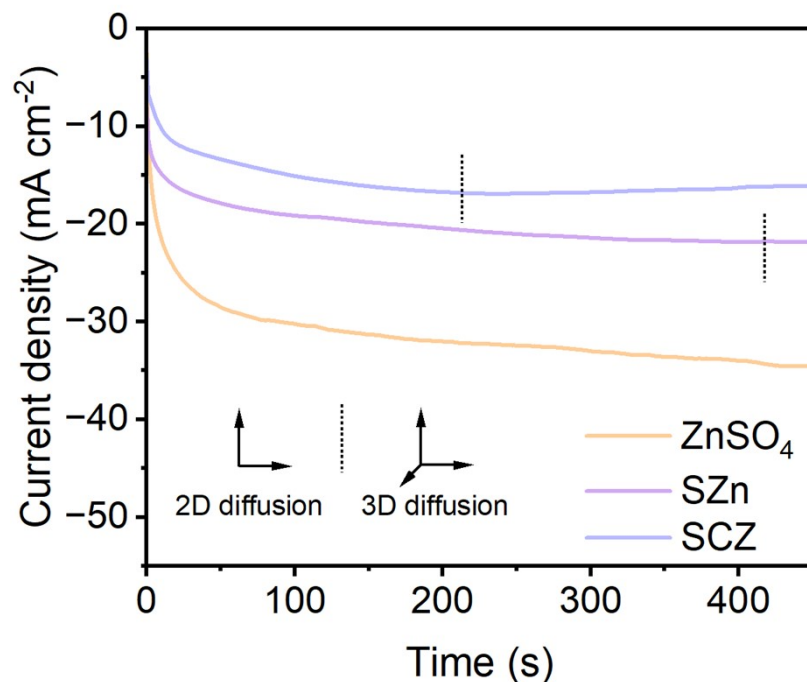

**Figure S4.** Chronoamperometry curves of the Zn//Zn cell at a constant voltage of -150 mV.

**Table S1** The performance comparison between SCZ electrolyte and reported hydrogel electrolytes.

| Types of hydrogels | $\sigma$<br>(kPa) | $\varepsilon$<br>(%) | Conductivity<br>(mS/cm) | Zn//Zn Cycle<br>life (h)           | Reference |
|--------------------|-------------------|----------------------|-------------------------|------------------------------------|-----------|
| SCZ                | 730               | 186                  | 18.0                    | 1100<br>(1 mA cm <sup>-2</sup> )   | This work |
| PAM-SL-QCS         | 81                | 1700                 | 28.0                    | 520<br>(0.5 mA cm <sup>-2</sup> )  | Ref. 1    |
| PI2                | 280               | 362                  | 12.5                    | 800<br>(0.2 mA cm <sup>-2</sup> )  | Ref. 2    |
| GP30HE             | 2400              | 370                  | 12.6                    | 1000<br>(0.5 mA cm <sup>-2</sup> ) | Ref. 3    |
| DN-PC100-1wt%      | 150               | 1080                 | 17.4                    | 600<br>(1 mA cm <sup>-2</sup> )    | Ref. 4    |
| PSAZn              | 21                | 620                  | 59.0                    | 800<br>(1 mA cm <sup>-2</sup> )    | Ref. 5    |
| CMC/GO             | 1380              | 70                   | 20.5                    | 800<br>(1 mA cm <sup>-2</sup> )    | Ref. 6    |

## References

1. Y. Wu, S. Liao, Z. Zeng and J. Qu, *European Polymer Journal*, 2025, **238**.
2. Y. Chen, M. Zhu, C. Li, H. Wang, D. Chen, H. Wu, Z. Huang, Y. Wang, Y. Fan, Z. Bai, S. Chen, Y. Tang and Y. Zhang, *Advanced Functional Materials*, 2025, **35**.
3. Q. Xie, H. Zhang, L. Wang, R. Dong, W. Xie, M. Asraful Alam, J. Xu and W. Xiong, *Journal of Colloid and Interface Science*, 2025, **697**.
4. A. Somteds, P. Tayraukham, P. Pipattanachaiyanan, W. Kao-ian, S. Wannapaiboon, S. Loiha, N. Sukpirom, M. Suttipong, J. Guo, S. Kheawhom and J. Unruangsri, *ACS Sustainable Chemistry & Engineering*, 2025, **13**, 9974-9986.
5. Y. Xu, B. Lan, Y. Cheng, L. Shi, J. Sun, S. Sun and R. Wang, *Journal of Materials Chemistry A*, 2024, **12**, 13191-13202.
6. X. Li, Y. Li, Y. Jiang, D. Wang and F. Ran, *Green Energy & Environment*, 2025, **10**, 537-550.
